# Supplementary material for: A Multiplex PCR Based on Mitochondrial COI Sequences for Identification of Members of the Anopheles barbirostris Complex (Diptera: Culicidae) in Thailand and Other Countries in the Region
Source: PubMed Central journal article supplement (PMC7412068; doi:10.3390/insects11070409), 2020-07-02
Supplement: insects-11-00409-s001.pdf [file insects-11-00409-s001.pdf]

Figure S1. Alignments of *COI* sequences of *An. barbirostris* s.l. from GenBank used for designing specific primers for *An. barbirostris* s.s. (yellow), *An. saeungae* (green), *An. wejchoochotei* (pink), *An. barbirostris* A3 (blue) and *An. dissidens* (gray). Dots (·) indicate identity of nucleotides within the alignment.

|            |                          | 1        | 1111111112 | 2222222223 | 3333333334 | 4444444445  | 5555555556  |
|------------|--------------------------|----------|------------|------------|------------|-------------|-------------|
| AB331574.1 | <i>An. barbirostris</i>  | ACB1     | TACTTTATAT | TTTATTTTGT | GAGCTTGAGC | CGGAATAGTA  | GGAACCTTCTT |
| AB331575.1 | <i>An. barbirostris</i>  | ACB2     | .....      | .....      | .....      | .....       | .....       |
| AB331576.1 | <i>An. barbirostris</i>  | ACB3     | .....      | .....      | .....      | .....       | .....       |
| AB331577.1 | <i>An. barbirostris</i>  | AUB2     | .....      | .....      | .....      | .....       | .....       |
| AB331578.1 | <i>An. barbirostris</i>  | AUB6     | .....      | .....      | .....      | .....       | .....       |
| AB331579.1 | <i>An. barbirostris</i>  | AUB10    | .....      | .....      | .....      | .....       | .....       |
| AB331580.1 | <i>An. barbirostris</i>  | AUB11    | .....      | .....      | .....      | .....       | .....       |
| AB435997.1 | <i>An. barbirostris</i>  | ALpA1    | .....      | .....      | A.....     | .....       | .....       |
| AB436002.1 | <i>An. barbirostris</i>  | AUDa8    | .....      | .....      | A.....     | .....       | .....       |
| AB436007.1 | <i>An. barbirostris</i>  | AUbB1    | .....      | .....      | A.....     | .....       | .....       |
| AB436014.1 | <i>An. barbirostris</i>  | ARbA3    | .....      | .....      | A.....     | .....       | .....       |
| AB436015.1 | <i>An. barbirostris</i>  | ARbB4    | .....      | .....      | A.....     | .....       | .....       |
| AB331570.1 | <i>An. barbirostris</i>  | APA13    | .....      | .....      | A.....     | .....       | .....       |
| AB331571.1 | <i>An. barbirostris</i>  | APA14    | .....      | .....      | A.....     | .....       | .....       |
| AB331572.1 | <i>An. barbirostris</i>  | APA18    | .....      | .....      | A.....     | .....       | .....       |
| AB362238.1 | <i>An. barbirostris</i>  | AKA2     | .....      | .....      | .....      | .....       | .....       |
| AB362239.1 | <i>An. barbirostris</i>  | AKA3     | .....      | .....      | .....      | .....       | .....       |
| AB362240.1 | <i>An. barbirostris</i>  | AKA5     | .....      | .....      | .....      | .....       | .....       |
| AB373942.1 | <i>An. barbirostris</i>  | ACA9     | .....      | .....      | .....      | .....A..... | .....       |
| AB373943.1 | <i>An. barbirostris</i>  | ACA13    | .....      | .....      | .....      | .....A..... | .....       |
| AB373944.1 | <i>An. barbirostris</i>  | ACA18    | .....      | .....      | .....      | .....A..... | .....       |
| AB331582.1 | <i>An. campestris</i>    | HCB9     | .....      | .....      | .....      | .....       | .....       |
| AB331583.1 | <i>An. campestris</i>    | HCB10    | .....      | .....      | .....      | .....       | .....       |
| AB331584.1 | <i>An. campestris</i>    | HCB13    | .....      | .....      | .....      | .....       | .....       |
| AB331585.1 | <i>An. campestris</i>    | HCE6     | .....      | .....      | .....      | .....       | .....       |
| AB331586.1 | <i>An. campestris</i>    | HCE7     | .....      | .....      | .....      | .....       | .....       |
| AB331587.1 | <i>An. campestris</i>    | HCE8     | .....      | .....      | .....      | .....       | .....       |
| AB331588.1 | <i>An. campestris</i>    | HCE16    | .....      | .....      | .....      | .....       | .....       |
| AB971336.1 | <i>An. wejchoochotei</i> | HCE2 (1) | .....      | .....      | .....      | .....       | .....       |
| AB971337.1 | <i>An. wejchoochotei</i> | HCE3 (1) | .....      | .....      | .....      | .....       | .....       |
| AB971338.1 | <i>An. wejchoochotei</i> | HCE4 (1) | .....      | .....      | .....      | .....       | .....       |

  

|            |                          |          |             | 1           | 1111111111  | 1111111111  |
|------------|--------------------------|----------|-------------|-------------|-------------|-------------|
| AB331574.1 | <i>An. barbirostris</i>  | ACB1     | TATTCGAGCA  | GAATTAGGTC  | ATCCAGGAGC  | TTTTATTGGA  |
| AB331575.1 | <i>An. barbirostris</i>  | ACB2     | .....       | .....       | .....       | .....       |
| AB331576.1 | <i>An. barbirostris</i>  | ACB3     | .....       | .....       | .....       | .....       |
| AB331577.1 | <i>An. barbirostris</i>  | AUB2     | .....       | .....       | .....       | .....       |
| AB331578.1 | <i>An. barbirostris</i>  | AUB6     | .....       | .....       | .....       | .....       |
| AB331579.1 | <i>An. barbirostris</i>  | AUB10    | .....       | .....       | .....       | .....       |
| AB331580.1 | <i>An. barbirostris</i>  | AUB11    | .....       | .....       | .....       | .....       |
| AB435997.1 | <i>An. barbirostris</i>  | ALpA1    | .....T..... | .....C..... | .....A..... | .....       |
| AB436002.1 | <i>An. barbirostris</i>  | AUDa8    | .....T..... | .....C..... | .....A..... | .....       |
| AB436007.1 | <i>An. barbirostris</i>  | AUbB1    | .....T..... | .....C..... | .....A..... | .....G..... |
| AB436014.1 | <i>An. barbirostris</i>  | ARbA3    | .....T..... | .....C..... | .....A..... | .....       |
| AB436015.1 | <i>An. barbirostris</i>  | ARbB4    | .....T..... | .....C..... | .....A..... | .....       |
| AB331570.1 | <i>An. barbirostris</i>  | APA13    | .....T..... | .....C..... | .....A..... | .....       |
| AB331571.1 | <i>An. barbirostris</i>  | APA14    | .....T..... | .....C..... | .....A..... | .....       |
| AB331572.1 | <i>An. barbirostris</i>  | APA18    | .....T..... | .....C..... | .....A..... | .....       |
| AB362238.1 | <i>An. barbirostris</i>  | AKA2     | .....T..... | .....       | .....       | .....       |
| AB362239.1 | <i>An. barbirostris</i>  | AKA3     | .....T..... | .....       | .....       | .....       |
| AB362240.1 | <i>An. barbirostris</i>  | AKA5     | .....T..... | .....       | .....       | .....       |
| AB373942.1 | <i>An. barbirostris</i>  | ACA9     | .....T..... | .....       | .....G..... | .....       |
| AB373943.1 | <i>An. barbirostris</i>  | ACA13    | .....T..... | .....       | .....G..... | .....       |
| AB373944.1 | <i>An. barbirostris</i>  | ACA18    | .....T..... | .....       | .....G..... | .....       |
| AB331582.1 | <i>An. campestris</i>    | HCB9     | .....T..... | .....       | .....       | .....       |
| AB331583.1 | <i>An. campestris</i>    | HCB10    | .....T..... | .....       | .....       | .....       |
| AB331584.1 | <i>An. campestris</i>    | HCB13    | .....T..... | .....       | .....       | .....       |
| AB331585.1 | <i>An. campestris</i>    | HCE6     | .....T..... | .....       | .....       | .....       |
| AB331586.1 | <i>An. campestris</i>    | HCE7     | .....T..... | .....       | .....       | .....       |
| AB331587.1 | <i>An. campestris</i>    | HCE8     | .....T..... | .....       | .....       | .....       |
| AB331588.1 | <i>An. campestris</i>    | HCE16    | .....T..... | .....       | .....       | .....       |
| AB971336.1 | <i>An. wejchoochotei</i> | HCE2 (1) | .....T..... | .....       | .....       | .....       |
| AB971337.1 | <i>An. wejchoochotei</i> | HCE3 (1) | .....T..... | .....       | .....       | .....       |
| AB971338.1 | <i>An. wejchoochotei</i> | HCE4 (1) | .....T..... | .....       | .....       | .....       |

|            |                   |            |            |            |            |            |
|------------|-------------------|------------|------------|------------|------------|------------|
|            | 1111111111        | 1111111111 | 1111111111 | 1111111111 | 1111111111 | 1111111111 |
|            | 2222222223        | 3333333334 | 4444444445 | 5555555556 | 6666666667 | 7777777778 |
|            | 1234567890        | 1234567890 | 1234567890 | 1234567890 | 1234567890 | 1234567890 |
|            | AATTGTTACA        | GCTCATGCTT | TTATTATAAT | TTTTTTTATA | GTTATACCTA | TTATAATTGG |
| AB331574.1 | An. barbirostris  | ACB1       |            |            |            |            |
| AB331575.1 | An. barbirostris  | ACB2       |            |            |            |            |
| AB331576.1 | An. barbirostris  | ACB3       |            |            |            |            |
| AB331577.1 | An. barbirostris  | AUB2       |            |            |            |            |
| AB331578.1 | An. barbirostris  | AUB6       |            |            |            |            |
| AB331579.1 | An. barbirostris  | AUB10      |            |            |            |            |
| AB331580.1 | An. barbirostris  | AUB11      |            |            |            |            |
| AB435997.1 | An. barbirostris  | ALpA1      |            |            |            |            |
| AB436002.1 | An. barbirostris  | AUDa8      |            |            |            |            |
| AB436007.1 | An. barbirostris  | AUBb1      |            |            |            |            |
| AB436014.1 | An. barbirostris  | ARbA3      |            |            |            |            |
| AB436015.1 | An. barbirostris  | ARbB4      |            |            |            |            |
| AB331570.1 | An. barbirostris  | APA13      |            |            |            |            |
| AB331571.1 | An. barbirostris  | APA14      |            |            |            |            |
| AB331572.1 | An. barbirostris  | APA18      |            |            |            |            |
| AB362238.1 | An. barbirostris  | AKA2       |            |            |            |            |
| AB362239.1 | An. barbirostris  | AKA3       |            |            |            |            |
| AB362240.1 | An. barbirostris  | AKA5       |            |            |            |            |
| AB373942.1 | An. barbirostris  | ACA9       |            |            |            |            |
| AB373943.1 | An. barbirostris  | ACA13      |            |            |            |            |
| AB373944.1 | An. barbirostris  | ACA18      |            |            |            |            |
| AB331582.1 | An. campestris    | HCB9       |            |            |            |            |
| AB331583.1 | An. campestris    | HCB10      |            |            |            |            |
| AB331584.1 | An. campestris    | HCB13      |            |            |            |            |
| AB331585.1 | An. campestris    | HCE6       |            |            |            |            |
| AB331586.1 | An. campestris    | HCE7       |            |            |            |            |
| AB331587.1 | An. campestris    | HCE8       |            |            |            |            |
| AB331588.1 | An. campestris    | HCE16      |            |            |            |            |
| AB971336.1 | An. wejchoochotei | HCE2 (1)   |            |            |            |            |
| AB971337.1 | An. wejchoochotei | HCE3 (1)   |            |            |            |            |
| AB971338.1 | An. wejchoochotei | HCE4 (1)   |            |            |            |            |

|            |                   |            |            |            |            |             |
|------------|-------------------|------------|------------|------------|------------|-------------|
|            | 1111111111        | 1111111112 | 2222222222 | 2222222222 | 2222222222 | 2222222222  |
|            | 8888888889        | 9999999990 | 0000000001 | 1111111112 | 2222222223 | 3333333334  |
|            | 1234567890        | 1234567890 | 1234567890 | 1234567890 | 1234567890 | 1234567890  |
|            | ACGATTGGGA        | AACGATTAG  | TACCTTTAAT | ATTAGGAGCC | CCTGATATAG | CATTTCCCTCG |
| AB331574.1 | An. barbirostris  | ACB1       |            |            |            |             |
| AB331575.1 | An. barbirostris  | ACB2       |            |            |            |             |
| AB331576.1 | An. barbirostris  | ACB3       |            |            |            |             |
| AB331577.1 | An. barbirostris  | AUB2       |            |            |            |             |
| AB331578.1 | An. barbirostris  | AUB6       |            |            |            |             |
| AB331579.1 | An. barbirostris  | AUB10      |            |            |            |             |
| AB331580.1 | An. barbirostris  | AUB11      |            |            |            |             |
| AB435997.1 | An. barbirostris  | ALpA1      |            |            |            |             |
| AB436002.1 | An. barbirostris  | AUDa8      |            |            |            |             |
| AB436007.1 | An. barbirostris  | AUBb1      |            |            |            |             |
| AB436014.1 | An. barbirostris  | ARbA3      |            |            |            |             |
| AB436015.1 | An. barbirostris  | ARbB4      |            |            |            |             |
| AB331570.1 | An. barbirostris  | APA13      |            |            |            |             |
| AB331571.1 | An. barbirostris  | APA14      |            |            |            |             |
| AB331572.1 | An. barbirostris  | APA18      |            |            |            |             |
| AB362238.1 | An. barbirostris  | AKA2       |            |            |            |             |
| AB362239.1 | An. barbirostris  | AKA3       |            |            |            |             |
| AB362240.1 | An. barbirostris  | AKA5       |            |            |            |             |
| AB373942.1 | An. barbirostris  | ACA9       |            |            |            |             |
| AB373943.1 | An. barbirostris  | ACA13      |            |            |            |             |
| AB373944.1 | An. barbirostris  | ACA18      |            |            |            |             |
| AB331582.1 | An. campestris    | HCB9       |            |            |            |             |
| AB331583.1 | An. campestris    | HCB10      |            |            |            |             |
| AB331584.1 | An. campestris    | HCB13      |            |            |            |             |
| AB331585.1 | An. campestris    | HCE6       |            |            |            |             |
| AB331586.1 | An. campestris    | HCE7       |            |            |            |             |
| AB331587.1 | An. campestris    | HCE8       |            |            |            |             |
| AB331588.1 | An. campestris    | HCE16      |            |            |            |             |
| AB971336.1 | An. wejchoochotei | HCE2 (1)   |            |            |            |             |
| AB971337.1 | An. wejchoochotei | HCE3 (1)   |            |            |            |             |
| AB971338.1 | An. wejchoochotei | HCE4 (1)   |            |            |            |             |

|            |                   |          |            |            |            |            |            |            |            |
|------------|-------------------|----------|------------|------------|------------|------------|------------|------------|------------|
|            |                   |          | 2222222222 | 2222222222 | 2222222222 | 2222222222 | 2222222222 | 2222222222 | 2222222222 |
|            |                   |          | 4444444445 | 5555555556 | 6666666667 | 7777777778 | 8888888889 | 9999999990 |            |
|            |                   |          | 1234567890 | 1234567890 | 1234567890 | 1234567890 | 1234567890 | 1234567890 |            |
|            |                   |          | AATAAATAAT | ATAAGATTTT | GAATATTACC | CCCTTCTCTT | ACTTTATTAA | TTTCTAGAAG |            |
| AB331574.1 | An. barbirostris  | ACB1     | .....      | .....      | .....      | .....      | .....      | .....      |            |
| AB331575.1 | An. barbirostris  | ACB2     | .....      | .....      | .....      | .....      | .....      | .....      |            |
| AB331576.1 | An. barbirostris  | ACB3     | .....      | .....      | .....      | .....      | .....      | .....      |            |
| AB331577.1 | An. barbirostris  | AUB2     | .....      | .....      | .....      | .....      | .....      | .....      |            |
| AB331578.1 | An. barbirostris  | AUB6     | .....      | .....      | .....      | T.....     | .....      | .....      |            |
| AB331579.1 | An. barbirostris  | AUB10    | .....      | .....      | .....      | .....      | .....      | .....      |            |
| AB331580.1 | An. barbirostris  | AUB11    | .....      | .....      | .....      | T.....     | .....      | .....      |            |
| AB435997.1 | An. barbirostris  | ALpA1    | .....      | .....      | .....      | T.....     | .....      | .....      |            |
| AB436002.1 | An. barbirostris  | AUDa8    | .....      | .....      | .....      | T.....     | .....      | .....      |            |
| AB436007.1 | An. barbirostris  | AUbB1    | .....      | .....      | .....      | T.....     | .....      | .....      |            |
| AB436014.1 | An. barbirostris  | ARbA3    | .....      | .....      | .....      | T.....     | .....      | .....      |            |
| AB436015.1 | An. barbirostris  | ARbB4    | .....      | .....      | .....      | T.....     | .....      | .....      |            |
| AB331570.1 | An. barbirostris  | APA13    | .....      | .....      | .....      | T.....GC   | .....      | .....      |            |
| AB331571.1 | An. barbirostris  | APA14    | .....      | .....      | .....      | T.....     | .....      | .....      |            |
| AB331572.1 | An. barbirostris  | APA18    | .....      | .....      | .....      | T.....     | .....      | .....      |            |
| AB362238.1 | An. barbirostris  | AKA2     | .....      | .....      | .....      | T.....     | .....      | .....      |            |
| AB362239.1 | An. barbirostris  | AKA3     | .....      | .....      | .....      | T.....     | .....      | .....      |            |
| AB362240.1 | An. barbirostris  | AKA5     | .....      | .....      | .....      | T.....     | .....      | .....      |            |
| AB373942.1 | An. barbirostris  | ACA9     | .....      | .....      | .....      | C.....     | T.....     | .....      |            |
| AB373943.1 | An. barbirostris  | ACA13    | .....      | .....      | .....      | T.....     | .....      | .....      |            |
| AB373944.1 | An. barbirostris  | ACA18    | .....      | .....      | .....      | C.....     | T.....     | .....      |            |
| AB331582.1 | An. campestris    | HCB9     | .....      | .....      | .....      | T.....     | .....      | .....      |            |
| AB331583.1 | An. campestris    | HCB10    | .....      | .....      | .....      | T.....     | .....      | .....      |            |
| AB331584.1 | An. campestris    | HCB13    | .....      | .....      | .....      | T.....     | .....      | .....      |            |
| AB331585.1 | An. campestris    | HCE6     | .....      | .....      | .....      | T.....     | .....      | .....      |            |
| AB331586.1 | An. campestris    | HCE7     | .....      | .....      | .....      | T.....     | .....      | .....      |            |
| AB331587.1 | An. campestris    | HCE8     | .....      | .....      | .....      | T.....     | .....      | .....      |            |
| AB331588.1 | An. campestris    | HCE16    | .....      | .....      | .....      | T.....     | .....      | .....      |            |
| AB971336.1 | An. wejchoochotei | HCE2 (1) | .....      | .....      | .....      | T.....     | .....      | .....      |            |
| AB971337.1 | An. wejchoochotei | HCE3 (1) | .....      | .....      | .....      | T.....     | .....      | .....      |            |
| AB971338.1 | An. wejchoochotei | HCE4 (1) | .....      | .....      | .....      | T.....     | .....      | .....      |            |

|            |                   |          |            |            |            |             |             |             |             |
|------------|-------------------|----------|------------|------------|------------|-------------|-------------|-------------|-------------|
|            |                   |          | 3333333333 | 3333333333 | 3333333333 | 3333333333  | 3333333333  | 3333333333  | 3333333333  |
|            |                   |          | 0000000001 | 1111111112 | 2222222223 | 3333333334  | 4444444445  | 5555555556  |             |
|            |                   |          | 1234567890 | 1234567890 | 1234567890 | 1234567890  | 1234567890  | 1234567890  |             |
|            |                   |          | TATAGTAGAA | AATGGAGCTG | GAACTGGATG | AACTGTTTAT  | CCACCATTAT  | CTTCCGGAAT  |             |
| AB331574.1 | An. barbirostris  | ACB1     | .....      | .....      | .....      | .....       | .....       | .....       |             |
| AB331575.1 | An. barbirostris  | ACB2     | .....      | .....      | .....      | .....       | .....       | .....       |             |
| AB331576.1 | An. barbirostris  | ACB3     | .....      | .....      | .....      | .....       | .....       | .....       |             |
| AB331577.1 | An. barbirostris  | AUB2     | .....      | .....      | .....      | .....       | .....       | .....       |             |
| AB331578.1 | An. barbirostris  | AUB6     | .....      | .....      | .....      | .....       | .....       | .....       |             |
| AB331579.1 | An. barbirostris  | AUB10    | .....      | .....      | .....      | .....       | .....       | .....       |             |
| AB331580.1 | An. barbirostris  | AUB11    | .....      | .....      | .....      | .....       | .....       | .....       |             |
| AB435997.1 | An. barbirostris  | ALpA1    | .....      | .....      | .....      | .....G..... | .....C..... | .....T..... | .....T..... |
| AB436002.1 | An. barbirostris  | AUDa8    | .....      | .....      | .....      | .....G..... | .....C..... | .....T..... | .....T..... |
| AB436007.1 | An. barbirostris  | AUbB1    | .....      | .....      | .....      | .....G..... | .....C..... | .....T..... | .....T..... |
| AB436014.1 | An. barbirostris  | ARbA3    | .....      | .....      | .....      | .....G..... | .....C..... | .....T..... | .....T..... |
| AB436015.1 | An. barbirostris  | ARbB4    | .....      | .....      | .....      | .....G..... | .....C..... | .....T..... | .....T..... |
| AB331570.1 | An. barbirostris  | APA13    | .....      | .....      | .....      | .....G..... | .....C..... | .....T..... | .....T..... |
| AB331571.1 | An. barbirostris  | APA14    | .....      | .....      | .....      | .....G..... | .....C..... | .....T..... | .....T..... |
| AB331572.1 | An. barbirostris  | APA18    | .....      | .....      | .....      | .....G..... | .....C..... | .....T..... | .....T..... |
| AB362238.1 | An. barbirostris  | AKA2     | .....      | .....      | .....      | .....C..... | .....A..... | .....T..... | .....T..... |
| AB362239.1 | An. barbirostris  | AKA3     | .....      | .....      | .....      | .....C..... | .....A..... | .....T..... | .....T..... |
| AB362240.1 | An. barbirostris  | AKA5     | .....      | .....      | .....      | .....C..... | .....A..... | .....T..... | .....T..... |
| AB373942.1 | An. barbirostris  | ACA9     | .....      | .....      | .....      | .....C..... | .....G..... | .....T..... | .....T..... |
| AB373943.1 | An. barbirostris  | ACA13    | .....      | .....      | .....      | .....G..... | .....G..... | .....T..... | .....T..... |
| AB373944.1 | An. barbirostris  | ACA18    | .....      | .....      | .....      | .....G..... | .....G..... | .....T..... | .....T..... |
| AB331582.1 | An. campestris    | HCB9     | .....      | .....      | .....      | .....G..... | .....C..... | .....T..... | .....T..... |
| AB331583.1 | An. campestris    | HCB10    | .....      | .....      | .....      | .....G..... | .....C..... | .....T..... | .....T..... |
| AB331584.1 | An. campestris    | HCB13    | .....      | .....      | .....      | .....G..... | .....C..... | .....T..... | .....T..... |
| AB331585.1 | An. campestris    | HCE6     | .....      | .....      | .....      | .....G..... | .....C..... | .....T..... | .....T..... |
| AB331586.1 | An. campestris    | HCE7     | .....      | .....      | .....      | .....G..... | .....C..... | .....T..... | .....T..... |
| AB331587.1 | An. campestris    | HCE8     | .....      | .....      | .....      | .....G..... | .....C..... | .....T..... | .....T..... |
| AB331588.1 | An. campestris    | HCE16    | .....      | .....      | .....      | .....G..... | .....C..... | .....T..... | .....T..... |
| AB971336.1 | An. wejchoochotei | HCE2 (1) | .....      | .....      | .....      | .....G..... | .....C..... | .....T..... | .....T..... |
| AB971337.1 | An. wejchoochotei | HCE3 (1) | .....      | .....      | .....      | .....G..... | .....C..... | .....T..... | .....T..... |
| AB971338.1 | An. wejchoochotei | HCE4 (1) | .....      | .....      | .....      | .....G..... | .....C..... | .....T..... | .....T..... |

|            |                          |            |            |            |             |            |
|------------|--------------------------|------------|------------|------------|-------------|------------|
|            | 3333333333               | 3333333333 | 3333333333 | 3333333334 | 4444444444  | 4444444444 |
|            | 6666666667               | 7777777778 | 8888888889 | 9999999990 | 0000000001  | 1111111112 |
|            | 1234567890               | 1234567890 | 1234567890 | 1234567890 | 1234567890  | 1234567890 |
|            | TGCACATGCA               | GGAGCCTCTG | TTGATTTAGC | TATTTTTTCA | TTACATTTAG  | CAGGAATTC  |
| AB331574.1 | An. <i>barbirostris</i>  | ACB1       |            |            |             |            |
| AB331575.1 | An. <i>barbirostris</i>  | ACB2       |            |            |             |            |
| AB331576.1 | An. <i>barbirostris</i>  | ACB3       |            |            |             |            |
| AB331577.1 | An. <i>barbirostris</i>  | AUB2       |            |            |             |            |
| AB331578.1 | An. <i>barbirostris</i>  | AUB6       |            |            |             |            |
| AB331579.1 | An. <i>barbirostris</i>  | AUB10      |            |            |             |            |
| AB331580.1 | An. <i>barbirostris</i>  | AUB11      |            |            |             |            |
| AB435997.1 | An. <i>barbirostris</i>  | ALpA1      | ..T.....   | ..G..T.... | .....A....  | .....      |
| AB436002.1 | An. <i>barbirostris</i>  | AUdA8      | ..T.....   | .....T.... | .....A....  | .....      |
| AB436007.1 | An. <i>barbirostris</i>  | AUbB1      | ..T.....   | .....T.... | .....A....  | .....      |
| AB436014.1 | An. <i>barbirostris</i>  | ARbA3      | ..T.....   | .....T.... | .....A....  | .....      |
| AB436015.1 | An. <i>barbirostris</i>  | ARbB4      | ..T.....   | .....T.... | .....A....  | .....      |
| AB331570.1 | An. <i>barbirostris</i>  | APA13      | ..T.....   | .....T.... | .....A....  | .....      |
| AB331571.1 | An. <i>barbirostris</i>  | APA14      | ..T.....   | .....T.... | .....A....  | .....      |
| AB331572.1 | An. <i>barbirostris</i>  | APA18      | ..T.....   | .....T.... | .....A....  | .....      |
| AB362238.1 | An. <i>barbirostris</i>  | AKA2       | .....      | .....T.... | .....G....  | .....      |
| AB362239.1 | An. <i>barbirostris</i>  | AKA3       | .....      | .....T.... | .....       | .....      |
| AB362240.1 | An. <i>barbirostris</i>  | AKA5       | .....      | .....T.... | .....       | .....      |
| AB373942.1 | An. <i>barbirostris</i>  | ACA9       | ..T.....   | .....T.... | .....T..A.. | .....      |
| AB373943.1 | An. <i>barbirostris</i>  | ACA13      | ..T.....   | .....T.... | .....T..A.. | .....      |
| AB373944.1 | An. <i>barbirostris</i>  | ACA18      | ..T.....   | .....T.... | .....T..A.. | .....      |
| AB331582.1 | An. <i>campestris</i>    | HCB9       | ..T.....   | .....T.... | .....A....  | .....      |
| AB331583.1 | An. <i>campestris</i>    | HCB10      | ..T.....   | .....T.... | .....A....  | .....      |
| AB331584.1 | An. <i>campestris</i>    | HCB13      | ..T.....   | .....T.... | .....A....  | .....      |
| AB331585.1 | An. <i>campestris</i>    | HCE6       | ..T.....   | .....T.... | .....A....  | .....      |
| AB331586.1 | An. <i>campestris</i>    | HCE7       | ..T.....   | .....T.... | .....A....  | .....      |
| AB331587.1 | An. <i>campestris</i>    | HCE8       | ..T.....   | .....T.... | .....A....  | .....      |
| AB331588.1 | An. <i>campestris</i>    | HCE16      | ..T.....   | .....T.... | .....A....  | .....      |
| AB971336.1 | An. <i>wejchoochotei</i> | HCE2(1)    | ..T.....   | .....T.... | .....A....  | .....      |
| AB971337.1 | An. <i>wejchoochotei</i> | HCE3(1)    | ..T.....   | .....T.... | .....A....  | .....      |
| AB971338.1 | An. <i>wejchoochotei</i> | HCE4(1)    | ..T.....   | .....T.... | .....A....  | .....      |

|            |                          |            |             |            |            |            |
|------------|--------------------------|------------|-------------|------------|------------|------------|
|            | 4444444444               | 4444444444 | 4444444444  | 4444444444 | 4444444444 | 4444444444 |
|            | 2222222223               | 3333333334 | 4444444445  | 5555555556 | 6666666667 | 7777777778 |
|            | 1234567890               | 1234567890 | 1234567890  | 1234567890 | 1234567890 | 1234567890 |
|            | TTCAATTTTA               | GGAGCAGTAA | ATTTTATATAC | TACTGTTATT | AATATACGAT | CACCAGGAAT |
| AB331574.1 | An. <i>barbirostris</i>  | ACB1       | .....       | .....      | .....      | .....      |
| AB331575.1 | An. <i>barbirostris</i>  | ACB2       | .....       | .....      | .....      | .....      |
| AB331576.1 | An. <i>barbirostris</i>  | ACB3       | .....       | .....      | .....      | .....      |
| AB331577.1 | An. <i>barbirostris</i>  | AUB2       | .....       | .....      | .....      | .....      |
| AB331578.1 | An. <i>barbirostris</i>  | AUB6       | .....       | .....      | .....      | .....      |
| AB331579.1 | An. <i>barbirostris</i>  | AUB10      | .....       | .....      | .....      | .....      |
| AB331580.1 | An. <i>barbirostris</i>  | AUB11      | .....       | .....      | .....      | .....      |
| AB435997.1 | An. <i>barbirostris</i>  | ALpA1      | .....       | ..G.....   | .....T.... | .....T..   |
| AB436002.1 | An. <i>barbirostris</i>  | AUdA8      | .....       | .....      | .....T.... | .....T..   |
| AB436007.1 | An. <i>barbirostris</i>  | AUbB1      | .....       | ..G.....   | .....T.... | .....T..   |
| AB436014.1 | An. <i>barbirostris</i>  | ARbA3      | .....       | ..G.....   | .....T.... | .....T..   |
| AB436015.1 | An. <i>barbirostris</i>  | ARbB4      | .....       | ..G.....   | .....T.... | .....T..   |
| AB331570.1 | An. <i>barbirostris</i>  | APA13      | .....       | ..G.....   | .....T.... | .....T..   |
| AB331571.1 | An. <i>barbirostris</i>  | APA14      | .....       | ..G.....   | .....T.... | .....T..   |
| AB331572.1 | An. <i>barbirostris</i>  | APA18      | .....       | ..G.....   | .....T.... | .....T..   |
| AB362238.1 | An. <i>barbirostris</i>  | AKA2       | .....       | .....      | .....T.... | .....T..   |
| AB362239.1 | An. <i>barbirostris</i>  | AKA3       | .....       | .....      | .....T.... | .....T..   |
| AB362240.1 | An. <i>barbirostris</i>  | AKA5       | .....       | .....      | .....T.... | .....T..   |
| AB373942.1 | An. <i>barbirostris</i>  | ACA9       | .....       | .....      | .....T.... | .....T..   |
| AB373943.1 | An. <i>barbirostris</i>  | ACA13      | .....       | .....      | .....T.... | .....T..   |
| AB373944.1 | An. <i>barbirostris</i>  | ACA18      | .....       | .....      | .....T.... | .....T..   |
| AB331582.1 | An. <i>campestris</i>    | HCB9       | .....       | .....      | .....T.... | .....T..   |
| AB331583.1 | An. <i>campestris</i>    | HCB10      | .....       | .....      | .....T.... | .....T..   |
| AB331584.1 | An. <i>campestris</i>    | HCB13      | .....       | .....      | .....T.... | .....T..   |
| AB331585.1 | An. <i>campestris</i>    | HCE6       | .....       | .....      | .....T.... | .....T..   |
| AB331586.1 | An. <i>campestris</i>    | HCE7       | .....       | .....      | .....T.... | .....T..   |
| AB331587.1 | An. <i>campestris</i>    | HCE8       | .....       | .....      | .....T.... | .....T..   |
| AB331588.1 | An. <i>campestris</i>    | HCE16      | .....       | .....      | .....T.... | .....T..   |
| AB971336.1 | An. <i>wejchoochotei</i> | HCE2(1)    | .....       | .....      | .....T.... | .....T..   |
| AB971337.1 | An. <i>wejchoochotei</i> | HCE3(1)    | .....       | .....      | .....T.... | .....T..   |
| AB971338.1 | An. <i>wejchoochotei</i> | HCE4(1)    | .....       | .....      | .....T.... | .....T..   |

|            |                                   |               |             |                   |            |             |
|------------|-----------------------------------|---------------|-------------|-------------------|------------|-------------|
|            | 4444444444                        | 4444444445    | 5555555555  | 5555555555        | 5555555555 | 5555555555  |
|            | 8888888888                        | 9999999990    | 0000000001  | 1111111112        | 2222222223 | 3333333334  |
|            | 1234567890                        | 1234567890    | 1234567890  | 1234567890        | 1234567890 | 1234567890  |
| AB331574.1 | An. <i>barbirostris</i> ACB1      | TACTCTTGAT    | CGAATACCTT  | TATTGTGTTG        | ATCTGTAGTT | ATTACAGCAG  |
| AB331575.1 | An. <i>barbirostris</i> ACB2      | .....         | .....       | .....             | .....      | .....       |
| AB331576.1 | An. <i>barbirostris</i> ACB3      | .....         | .....       | .....             | .....      | .....       |
| AB331577.1 | An. <i>barbirostris</i> AUB2      | .....         | .....       | .....             | .....      | .....       |
| AB331578.1 | An. <i>barbirostris</i> AUB6      | .....         | .....       | .....             | .....      | .....       |
| AB331579.1 | An. <i>barbirostris</i> AUB10     | .....         | .....       | .....             | .....      | .....       |
| AB331580.1 | An. <i>barbirostris</i> AUB11     | .....C.....   | .....       | .....             | .....      | .....       |
| AB435997.1 | An. <i>barbirostris</i> ALpA1     | .....         | .....       | G.....            | .....      | .....       |
| AB436002.1 | An. <i>barbirostris</i> AUdA8     | .....         | .....       | .....             | .....      | .....       |
| AB436007.1 | An. <i>barbirostris</i> AUbB1     | .....         | .....       | .....             | .....      | .....       |
| AB436014.1 | An. <i>barbirostris</i> ARbA3     | .....         | .....       | .....             | .....      | .....       |
| AB436015.1 | An. <i>barbirostris</i> ARbB4     | .....         | .....       | G.....            | .....      | .....       |
| AB331570.1 | An. <i>barbirostris</i> APA13     | .....         | .....       | .....             | .....      | .....       |
| AB331571.1 | An. <i>barbirostris</i> APA14     | .....         | .....       | .....             | .....      | .....       |
| AB331572.1 | An. <i>barbirostris</i> APA18     | .....         | .....       | .....             | .....      | .....       |
| AB362238.1 | An. <i>barbirostris</i> AKA2      | .....T.A..... | .....A..... | .....G.....C..... | .....      | .....A..... |
| AB362239.1 | An. <i>barbirostris</i> AKA3      | .....T.A..... | .....A..... | .....G.....C..... | .....      | .....A..... |
| AB362240.1 | An. <i>barbirostris</i> AKA5      | .....T.A..... | .....A..... | .....G.....C..... | .....      | .....A..... |
| AB373942.1 | An. <i>barbirostris</i> ACA9      | .....         | .....       | .....             | .....      | .....       |
| AB373943.1 | An. <i>barbirostris</i> ACA13     | .....         | .....       | .....             | .....      | .....       |
| AB373944.1 | An. <i>barbirostris</i> ACA18     | .....         | .....       | .....             | .....      | .....       |
| AB331582.1 | An. <i>campestris</i> HCB9        | .....         | .....       | .....             | .....      | .....       |
| AB331583.1 | An. <i>campestris</i> HCB10       | .....         | .....       | .....             | .....      | .....       |
| AB331584.1 | An. <i>campestris</i> HCB13       | .....         | .....       | .....             | .....      | .....       |
| AB331585.1 | An. <i>campestris</i> HCE6        | .....         | .....       | .....             | .....      | .....       |
| AB331586.1 | An. <i>campestris</i> HCE7        | .....         | .....       | .....             | .....      | .....       |
| AB331587.1 | An. <i>campestris</i> HCE8        | .....         | .....       | .....             | .....      | .....       |
| AB331588.1 | An. <i>campestris</i> HCE16       | .....         | .....       | .....             | .....      | .....       |
| AB971336.1 | An. <i>wejchoochotei</i> HCE2 (1) | .....         | .....       | .....             | .....      | .....       |
| AB971337.1 | An. <i>wejchoochotei</i> HCE3 (1) | .....         | .....       | .....             | .....      | .....       |
| AB971338.1 | An. <i>wejchoochotei</i> HCE4 (1) | .....         | .....       | .....             | .....      | .....       |

|            |                                   |            |            |                |            |             |
|------------|-----------------------------------|------------|------------|----------------|------------|-------------|
|            | 5555555555                        | 5555555555 | 5555555555 | 5555555555     | 5555555555 | 5555555555  |
|            | 4444444445                        | 5555555556 | 6666666667 | 7777777778     | 8888888889 | 9999999990  |
|            | 1234567890                        | 1234567890 | 1234567890 | 1234567890     | 1234567890 | 1234567890  |
| AB331574.1 | An. <i>barbirostris</i> ACB1      | ATTATCTTTA | CCAGTATTAG | CAGGAGCAAT     | TACTATATTA | TTAACTGATC  |
| AB331575.1 | An. <i>barbirostris</i> ACB2      | .....      | .....      | .....          | .....      | .....       |
| AB331576.1 | An. <i>barbirostris</i> ACB3      | .....      | .....      | .....          | .....      | .....       |
| AB331577.1 | An. <i>barbirostris</i> AUB2      | .....      | .....      | .....          | .....      | .....       |
| AB331578.1 | An. <i>barbirostris</i> AUB6      | .....      | .....      | .....          | .....      | .....       |
| AB331579.1 | An. <i>barbirostris</i> AUB10     | .....      | .....      | .....          | .....      | .....       |
| AB331580.1 | An. <i>barbirostris</i> AUB11     | .....      | .....      | .....          | .....      | .....       |
| AB435997.1 | An. <i>barbirostris</i> ALpA1     | .....      | .....      | .....          | .....      | .....       |
| AB436002.1 | An. <i>barbirostris</i> AUdA8     | .....      | .....      | .....          | .....      | .....       |
| AB436007.1 | An. <i>barbirostris</i> AUbB1     | .....      | .....      | .....          | .....      | .....       |
| AB436014.1 | An. <i>barbirostris</i> ARbA3     | .....      | .....      | .....          | .....      | .....       |
| AB436015.1 | An. <i>barbirostris</i> ARbB4     | .....      | .....      | G.....         | .....      | .....       |
| AB331570.1 | An. <i>barbirostris</i> APA13     | .....      | .....      | .....          | .....      | .....       |
| AB331571.1 | An. <i>barbirostris</i> APA14     | .....      | .....      | .....          | .....      | .....       |
| AB331572.1 | An. <i>barbirostris</i> APA18     | .....      | .....      | .....          | .....      | .....       |
| AB362238.1 | An. <i>barbirostris</i> AKA2      | .....      | .....      | .....          | .....      | .....C..... |
| AB362239.1 | An. <i>barbirostris</i> AKA3      | .....      | .....      | .....          | .....      | .....C..... |
| AB362240.1 | An. <i>barbirostris</i> AKA5      | .....      | .....      | .....          | .....      | .....C..... |
| AB373942.1 | An. <i>barbirostris</i> ACA9      | .....      | .....      | .....T..T..... | .....      | .....       |
| AB373943.1 | An. <i>barbirostris</i> ACA13     | .....      | .....      | .....T..T..... | .....      | .....       |
| AB373944.1 | An. <i>barbirostris</i> ACA18     | .....      | .....      | .....T..T..... | .....      | .....       |
| AB331582.1 | An. <i>campestris</i> HCB9        | .....      | .....      | G.....         | .....      | .....       |
| AB331583.1 | An. <i>campestris</i> HCB10       | .....      | .....      | G.....         | .....      | .....       |
| AB331584.1 | An. <i>campestris</i> HCB13       | .....      | .....      | G.....         | .....      | .....       |
| AB331585.1 | An. <i>campestris</i> HCE6        | .....      | .....      | G.....         | .....      | .....       |
| AB331586.1 | An. <i>campestris</i> HCE7        | .....      | .....      | G.....         | .....      | .....       |
| AB331587.1 | An. <i>campestris</i> HCE8        | .....      | .....      | G.....         | .....      | .....       |
| AB331588.1 | An. <i>campestris</i> HCE16       | .....      | .....      | G.....         | .....      | .....       |
| AB971336.1 | An. <i>wejchoochotei</i> HCE2 (1) | .....      | .....      | G.....         | .....      | .....       |
| AB971337.1 | An. <i>wejchoochotei</i> HCE3 (1) | .....      | .....      | G.....         | .....      | .....       |
| AB971338.1 | An. <i>wejchoochotei</i> HCE4 (1) | .....      | .....      | G.....         | .....      | .....       |

|            |                          |          |            |            |             |            |            |            |
|------------|--------------------------|----------|------------|------------|-------------|------------|------------|------------|
|            |                          |          | 6666666666 | 6666666666 | 6666666666  | 6666666666 | 6666666666 | 6666666666 |
|            |                          |          | 0000000001 | 1111111112 | 2222222223  | 3333333334 | 4444444445 | 555555555  |
|            |                          |          | 1234567890 | 1234567890 | 1234567890  | 1234567890 | 1234567890 | 12345678   |
|            |                          |          | TACATCATTT | TTTGATCCTG | CAGGAGGAGG  | AGATCCAATT | TTATATCAAC | ATTTATTT   |
| AB331574.1 | An. <i>barbirostris</i>  | ACB1     | .....      | .....      | .....       | .....      | .....      | .....      |
| AB331575.1 | An. <i>barbirostris</i>  | ACB2     | .....      | .....      | .....       | .....      | .....      | .....      |
| AB331576.1 | An. <i>barbirostris</i>  | ACB3     | .....      | .....      | .....       | .....      | .....      | .....      |
| AB331577.1 | An. <i>barbirostris</i>  | AUB2     | .....      | .....      | .....       | .....      | .....      | .....      |
| AB331578.1 | An. <i>barbirostris</i>  | AUB6     | .....      | .....      | .....       | .....      | .....      | .....      |
| AB331579.1 | An. <i>barbirostris</i>  | AUB10    | .....      | .....      | .....       | .....      | .....      | .....      |
| AB331580.1 | An. <i>barbirostris</i>  | AUB11    | .....      | .....      | .....       | .....      | .....      | .....      |
| AB435997.1 | An. <i>barbirostris</i>  | ALpA1    | .....T..C  | .....      | .....G..    | T..C.....  | .....      | .....      |
| AB436002.1 | An. <i>barbirostris</i>  | AUdA8    | .....T..C  | .....      | .....       | T..C.....  | .....      | .....      |
| AB436007.1 | An. <i>barbirostris</i>  | AUbB1    | .....T..C  | .....      | .....       | T..C.....  | .....      | .....      |
| AB436014.1 | An. <i>barbirostris</i>  | ARbA3    | .....T..C  | .....      | .....       | T..C.....  | .....      | .....      |
| AB436015.1 | An. <i>barbirostris</i>  | ARbB4    | .....T..C  | .....      | .....G..    | T..C.....  | .....      | .....      |
| AB331570.1 | An. <i>barbirostris</i>  | APA13    | .....T..C  | .....      | .....       | T..C.....  | .....      | .....      |
| AB331571.1 | An. <i>barbirostris</i>  | APA14    | .....T..C  | .....      | .....       | T..C.....  | .....      | .....      |
| AB331572.1 | An. <i>barbirostris</i>  | APA18    | .....T..C  | .....      | .....       | T..C.....  | .....      | .....      |
| AB362238.1 | An. <i>barbirostris</i>  | AKA2     | ...C.....  | ...C....   | .....       | G.....     | .....      | .....      |
| AB362239.1 | An. <i>barbirostris</i>  | AKA3     | ...C.....  | ...C....   | .....       | G.....     | .....      | .....      |
| AB362240.1 | An. <i>barbirostris</i>  | AKA5     | ...C.....  | ...C....   | .....       | G.....     | .....      | .....      |
| AB373942.1 | An. <i>barbirostris</i>  | ACA9     | .....C..C  | .....C..   | .....       | .....C..   | .....      | .....      |
| AB373943.1 | An. <i>barbirostris</i>  | ACA13    | .....C..C  | .....C..   | .....       | .....C..   | .....      | .....      |
| AB373944.1 | An. <i>barbirostris</i>  | ACA18    | .....C..C  | .....C..   | .....       | .....C..   | .....      | .....      |
| AB331582.1 | An. <i>campestris</i>    | HCB9     | .....T..C  | .....C..   | .....       | .....C..   | .....      | .....      |
| AB331583.1 | An. <i>campestris</i>    | HCB10    | .....T..C  | .....C..   | .....       | .....C..   | .....      | .....      |
| AB331584.1 | An. <i>campestris</i>    | HCB13    | .....T..C  | .....C..   | .....T..... | .....C..   | .....      | .....      |
| AB331585.1 | An. <i>campestris</i>    | HCE6     | .....T..C  | .....C..   | .....       | .....C..   | .....      | .....      |
| AB331586.1 | An. <i>campestris</i>    | HCE7     | .....T..C  | .....C..   | .....       | .....C..   | .....      | .....      |
| AB331587.1 | An. <i>campestris</i>    | HCE8     | .....T..C  | .....C..   | .....       | .....C..   | .....      | .....      |
| AB331588.1 | An. <i>campestris</i>    | HCE16    | .....T..C  | .....C..   | .....       | .....C..   | .....      | .....      |
| AB971336.1 | An. <i>wejchoochotei</i> | HCE2 (1) | .....T..C  | .....C..   | .....       | .....C..   | .....      | .....      |
| AB971337.1 | An. <i>wejchoochotei</i> | HCE3 (1) | .....T..C  | .....C..   | .....       | .....C..   | .....      | .....      |
| AB971338.1 | An. <i>wejchoochotei</i> | HCE4 (1) | .....T..C  | .....C..   | .....       | .....C..   | .....      | .....      |
